# Supplementary material for: Genetic and Molecular Characterization of Flagellar Assembly in Shewanella oneidensis
Source: PubMed Central journal article supplement (PMC3120886; doi:10.1371/journal.pone.0021479), 2011-06-22
Supplement: pone.0021479.s001.pdf [file pone.0021479.s001.pdf]

| Species                 | Organization of flagellin genes | Average Size of flagellins |
|-------------------------|---------------------------------|----------------------------|
| <i>S. oneidensis</i>    |                                 | ~270 a.a                   |
| <i>S. baltica</i> OS185 |                                 | ~270 a.a                   |
| <i>S. baltica</i> OS195 |                                 | ~270 a.a                   |
| <i>S. piezotolerans</i> |                                 | ~434 and 463 a.a           |
| <i>S. violacea</i>      |                                 | ~465 a.a                   |
| <i>S. benthica</i>      |                                 | ~344 a.a                   |
| <i>S. pealeana</i>      |                                 | ~393 a.a                   |
