# Supplementary material for: Genetic and Molecular Characterization of Flagellar Assembly in Shewanella oneidensis
Source: PubMed Central journal article supplement (PMC3120886; doi:10.1371/journal.pone.0021479), 2011-06-22
Supplement: pone.0021479.s002.pdf [file pone.0021479.s002.pdf]

Table S1  $\sigma^{28}$ -dependent genes in *Shewanella oneidensis*

| 1  | seq_id  | ft_name                     | strand | start | end | sequence                     | weight | Pval     | ln_Pval |
|----|---------|-----------------------------|--------|-------|-----|------------------------------|--------|----------|---------|
| 2  | rnt     | TAAAGkwtkyrhwhhdcytGCCGATAa | R      | 85    | 111 | TAAAGGAACATAAAAAGTTTGCCGATAA | 17.7   | 1.00E-09 | -20.706 |
| 3  | motY    | TAAAGkwtkyrhwhhdcytGCCGATAa | D      | 83    | 109 | TAAAGGAACATAAAAAGTTTGCCGATAA | 17.7   | 1.00E-09 | -20.706 |
| 4  | SO_3257 | TAAAGkwtkyrhwhhdcytGCCGATAa | D      | 135   | 161 | TAAAGTTATTGGCACAGCTGTGCGATAA | 13.6   | 1.50E-07 | -15.727 |
| 5  | SO_3258 | TAAAGkwtkyrhwhhdcytGCCGATAa | R      | 113   | 139 | TAAAGTTATTGGCACAGCTGTGCGATAA | 13.6   | 1.50E-07 | -15.727 |
| 6  | SO_3261 | TAAAGkwtkyrhwhhdcytGCCGATAa | D      | 11    | 37  | TAAAGCTTCCCTGTCAATTTGCCGTTAA | 13.2   | 2.20E-07 | -15.338 |
| 7  | flaB    | TAAAGkwtkyrhwhhdcytGCCGATAa | D      | 148   | 174 | TAAAGATAAAAAAGCTGCTGCCGCTAT  | 12.6   | 3.80E-07 | -14.775 |
| 8  | SO_3151 | TAAAGkwtkyrhwhhdcytGCCGATAa | D      | 3     | 29  | TAAAGTGTGTATACTGCGCGCCTTTAA  | 12.3   | 5.00E-07 | -14.503 |
| 9  | SO_0740 | TAAAGkwtkyrhwhhdcytGCCGATAa | D      | 165   | 191 | TAAAGTTGCGGATAATATTGCCGAAAA  | 11.1   | 1.40E-06 | -13.466 |
| 10 | SO_2500 | TAAAGkwtkyrhwhhdcytGCCGATAa | D      | 341   | 367 | TAAAGTCTTGTTCACACTGGTCGATTA  | 11.1   | 1.40E-06 | -13.466 |
| 11 | SO_4229 | TAAAGkwtkyrhwhhdcytGCCGATAa | D      | 342   | 368 | TAAAAATTAGGCAACTCCGGCCGATAA  | 11.1   | 1.40E-06 | -13.466 |
| 12 | ispA    | TAAAGkwtkyrhwhhdcytGCCGATAa | R      | 2     | 28  | TAAACTTGCTGAGTGCTTGTCCGATAA  | 10.6   | 2.10E-06 | -13.056 |
| 13 | pomA    | TAAAGkwtkyrhwhhdcytGCCGATAa | D      | 217   | 243 | TAAACTTGCTGAGTGCTTGTCCGATAA  | 10.6   | 2.10E-06 | -13.056 |
| 14 | hsdM-2  | TAAAGkwtkyrhwhhdcytGCCGATAa | D      | 25    | 51  | TAAACGATAGGCCATGACAGCCAATAA  | 10.1   | 3.20E-06 | -12.658 |
| 15 | flgM    | TAAAGkwtkyrhwhhdcytGCCGATAa | D      | 8     | 34  | TAAAGCTTTTTTGATGAGCTGCCGATAC | 9.9    | 3.70E-06 | -12.502 |
| 16 | nhaD    | TAAAGkwtkyrhwhhdcytGCCGATAa | R      | 45    | 71  | TCAAGTTAGTCTAAAAATAGCCAATAA  | 9.6    | 4.70E-06 | -12.271 |
| 17 | rne     | TAAAGkwtkyrhwhhdcytGCCGATAa | D      | 92    | 118 | TAAAGTTTTTCTCACCATTTCGAAAT   | 9.5    | 5.10E-06 | -12.194 |
| 18 | SO_2918 | TAAAGkwtkyrhwhhdcytGCCGATAa | R      | 57    | 83  | TAAACGGGGCGAAGAGGAAGTCGATAT  | 9.3    | 5.90E-06 | -12.043 |
| 19 | SO_3895 | TAAAGkwtkyrhwhhdcytGCCGATAa | R      | 277   | 303 | TAAACGATTTAAGCCGAAAACCGAAAT  | 9.1    | 6.80E-06 | -11.894 |
| 20 | rtxB    | TAAAGkwtkyrhwhhdcytGCCGATAa | R      | 44    | 70  | ACAAGTATCCACCACGATGGCCGATAT  | 8.9    | 7.90E-06 | -11.746 |
| 21 | SO_0819 | TAAAGkwtkyrhwhhdcytGCCGATAa | R      | 38    | 64  | TAAAGTATCCCTGTTTTTTTTACGCTAT | 8.9    | 7.90E-06 | -11.746 |
| 22 | SO_4512 | TAAAGkwtkyrhwhhdcytGCCGATAa | R      | 255   | 281 | TAATTAATCATCTTGCTTGCCGTTAA   | 8.7    | 9.20E-06 | -11.6   |
| 23 | SO_3944 | TAAAGkwtkyrhwhhdcytGCCGATAa | R      | 120   | 146 | TAAATGTCGCGTTCACATGGTCAATAA  | 8.3    | 1.20E-05 | -11.313 |
| 24 | SO_1136 | TAAAGkwtkyrhwhhdcytGCCGATAa | R      | 348   | 374 | GAAAGTTTACGCAGAGTTGGCAGTTAA  | 8.2    | 1.30E-05 | -11.242 |
| 25 | gcvP    | TAAAGkwtkyrhwhhdcytGCCGATAa | R      | 94    | 120 | TAAACCTTGTTCAGATTGCGGTAAC    | 8.1    | 1.40E-05 | -11.171 |
| 26 | SO_2083 | TAAAGkwtkyrhwhhdcytGCCGATAa | D      | 339   | 365 | TAAAGTCTATGGCAAATCGACCGATAT  | 8.1    | 1.40E-05 | -11.171 |

|    |          |                             |   |     |     |                              |     |          |         |
|----|----------|-----------------------------|---|-----|-----|------------------------------|-----|----------|---------|
| 27 | SO_0808  | TAAAGkwtkyrhwhhdcytGCCGATAa | D | 84  | 110 | TAAAGGTCATATCGCACTCGACGATCT  | 7.9 | 1.60E-05 | -11.032 |
| 28 | SO_0891  | TAAAGkwtkyrhwhhdcytGCCGATAa | D | 54  | 80  | TAAACGTCCTTCAAATAAAATCGCTAA  | 7.8 | 1.70E-05 | -10.962 |
| 29 | SO_2314  | TAAAGkwtkyrhwhhdcytGCCGATAa | D | 267 | 293 | TAAACGTCCTTCAAATAAAATCGCTAA  | 7.8 | 1.70E-05 | -10.962 |
| 30 | SO_3501  | TAAAGkwtkyrhwhhdcytGCCGATAa | D | 195 | 221 | TAAACGTACCAATCCCCGTACCGATGG  | 7.8 | 1.70E-05 | -10.962 |
| 31 | SO_A0100 | TAAAGkwtkyrhwhhdcytGCCGATAa | R | 118 | 144 | TAAACGTCCTTCAAATAAAATCGCTAA  | 7.8 | 1.70E-05 | -10.962 |
| 32 | aroA     | TAAAGkwtkyrhwhhdcytGCCGATAa | D | 98  | 124 | TAATCTGGCAAAAAAGCCTGCCGAAAA  | 7.7 | 1.90E-05 | -10.893 |
| 33 | asmA     | TAAAGkwtkyrhwhhdcytGCCGATAa | D | 4   | 30  | TAAAAAAATTCATATGTTATCGATAA   | 7.7 | 1.90E-05 | -10.893 |
| 34 | aspC-2   | TAAAGkwtkyrhwhhdcytGCCGATAa | R | 243 | 269 | TAATCTGGCAAAAAAGCCTGCCGAAAA  | 7.7 | 1.90E-05 | -10.893 |
| 35 | SO_4134  | TAAAGkwtkyrhwhhdcytGCCGATAa | R | 46  | 72  | TCAAGTTAACCTTCACCGCTTCGATAC  | 7.6 | 2.00E-05 | -10.824 |
| 36 | udp      | TAAAGkwtkyrhwhhdcytGCCGATAa | D | 317 | 343 | TCAAGTTAACCTTCACCGCTTCGATAC  | 7.6 | 2.00E-05 | -10.824 |
| 37 | flgB     | TAAAGkwtkyrhwhhdcytGCCGATAa | R | 90  | 116 | TGAACAAAGCAATTCATGTGCCAATAC  | 7.4 | 2.30E-05 | -10.688 |
| 38 | SO_0501  | TAAAGkwtkyrhwhhdcytGCCGATAa | R | 134 | 160 | TAAATGAGGTATATTCATAGCGCTAA   | 7.4 | 2.30E-05 | -10.688 |
| 39 | SO_0712  | TAAAGkwtkyrhwhhdcytGCCGATAa | D | 209 | 235 | TAAATTCGTTGATTAATAATGGCGATAA | 7.4 | 2.30E-05 | -10.688 |
| 40 | SO_3418  | TAAAGkwtkyrhwhhdcytGCCGATAa | R | 75  | 101 | TAAACGTCCTTATTTACCTGCTGATTA  | 7.4 | 2.30E-05 | -10.688 |
| 41 | SO_4470  | TAAAGkwtkyrhwhhdcytGCCGATAa | R | 148 | 174 | TAAGGTGTGACCGAATGATGGCGTTAA  | 7.4 | 2.30E-05 | -10.688 |
| 42 | radA     | TAAAGkwtkyrhwhhdcytGCCGATAa | R | 104 | 130 | TTAAGTAACTGTGAATACTGCCGACAT  | 7.3 | 2.40E-05 | -10.62  |
| 43 | SO_1225  | TAAAGkwtkyrhwhhdcytGCCGATAa | D | 29  | 55  | TTAAGTAACTGTGAATACTGCCGACAT  | 7.3 | 2.40E-05 | -10.62  |
| 44 | SO_1582  | TAAAGkwtkyrhwhhdcytGCCGATAa | D | 106 | 132 | TATACAAATCGTTAAATTAGGCGATAA  | 7.3 | 2.40E-05 | -10.62  |
| 45 | fadB     | TAAAGkwtkyrhwhhdcytGCCGATAa | D | 105 | 131 | TAAATTTATTCAATTTACCGCCAATTA  | 7.2 | 2.60E-05 | -10.553 |
| 46 | pemI     | TAAAGkwtkyrhwhhdcytGCCGATAa | R | 136 | 162 | TAAAGCCTCCTATTCACCTCGCCATTA  | 7.2 | 2.60E-05 | -10.553 |
| 47 | pepQ     | TAAAGkwtkyrhwhhdcytGCCGATAa | R | 245 | 271 | TAAATTTATTCAATTTACCGCCAATTA  | 7.2 | 2.60E-05 | -10.553 |
| 48 | SO_2768  | TAAAGkwtkyrhwhhdcytGCCGATAa | R | 36  | 62  | AAAAGTTTGTAAGCTAAGTGTCGGTAT  | 7.2 | 2.60E-05 | -10.553 |
| 49 | SO_2769  | TAAAGkwtkyrhwhhdcytGCCGATAa | D | 166 | 192 | AAAAGTTTGTAAGCTAAGTGTCGGTAT  | 7.2 | 2.60E-05 | -10.553 |
| 50 | SO_3688  | TAAAGkwtkyrhwhhdcytGCCGATAa | D | 30  | 56  | TAAACGTGGCAATTAGGTGGAAGTTAA  | 7.2 | 2.60E-05 | -10.553 |
| 51 | ftn      | TAAAGkwtkyrhwhhdcytGCCGATAa | R | 11  | 37  | TATATTTACCCAACCCTTTGCCCATAA  | 7.1 | 2.80E-05 | -10.486 |
| 52 | moeA     | TAAAGkwtkyrhwhhdcytGCCGATAa | D | 268 | 294 | TATATTTACCCAACCCTTTGCCCATAA  | 7.1 | 2.80E-05 | -10.486 |
| 53 | SO_0134  | TAAAGkwtkyrhwhhdcytGCCGATAa | D | 65  | 91  | TAAACCCGCATAAAAACTGCCGCTAA   | 7.1 | 2.80E-05 | -10.486 |

|    |           |                             |   |     |     |                              |     |          |         |
|----|-----------|-----------------------------|---|-----|-----|------------------------------|-----|----------|---------|
| 54 | SO_1158   | TAAAGkwtkyrhwhhdcytGCCGATAa | D | 37  | 63  | TAAAGGATACCAGCTCTAGGCTATTAA  | 7.1 | 2.80E-05 | -10.486 |
| 55 | SO_1159   | TAAAGkwtkyrhwhhdcytGCCGATAa | R | 156 | 182 | TAAAGGATACCAGCTCTAGGCTATTAA  | 7.1 | 2.80E-05 | -10.486 |
| 56 | SO_2714   | TAAAGkwtkyrhwhhdcytGCCGATAa | R | 47  | 73  | TAAAATAACCGCACCGTGAAACGATAT  | 7.1 | 2.80E-05 | -10.486 |
| 57 | SO_0910   | TAAAGkwtkyrhwhhdcytGCCGATAa | R | 266 | 292 | TAAAGAATGAGAAAGCTAAAACGATAT  | 7   | 3.00E-05 | -10.419 |
| 58 | SO_0341   | TAAAGkwtkyrhwhhdcytGCCGATAa | D | 110 | 136 | TAAACTTGCTTTTGGTTACAGCTGCTAA | 6.9 | 3.20E-05 | -10.353 |
| 59 | SO_0062   | TAAAGkwtkyrhwhhdcytGCCGATAa | R | 194 | 220 | TCAAGTTTTTCATCTGCTTTAGCGATAT | 6.8 | 3.40E-05 | -10.287 |
| 60 | SO_0641   | TAAAGkwtkyrhwhhdcytGCCGATAa | R | 111 | 137 | TAAAGGCTTCAATCCGAGAACCGTTCA  | 6.8 | 3.40E-05 | -10.287 |
| 61 | SO_0643   | TAAAGkwtkyrhwhhdcytGCCGATAa | D | 258 | 284 | TAAAGGCTTCAATCCGAGAACCGTTCA  | 6.8 | 3.40E-05 | -10.287 |
| 62 | SO_0672   | TAAAGkwtkyrhwhhdcytGCCGATAa | R | 7   | 33  | TAAAGTAATCTTTGATCGTGTAATAA   | 6.8 | 3.40E-05 | -10.287 |
| 63 | SO_1980   | TAAAGkwtkyrhwhhdcytGCCGATAa | D | 297 | 323 | TCATGTAGACAACAAGGGCGCCGTAA   | 6.8 | 3.40E-05 | -10.287 |
| 64 | SO_2263   | TAAAGkwtkyrhwhhdcytGCCGATAa | D | 131 | 157 | TCAAGATAGTGCCTTAGATCCCGATAT  | 6.8 | 3.40E-05 | -10.287 |
| 65 | SO_2439.2 | TAAAGkwtkyrhwhhdcytGCCGATAa | D | 19  | 45  | TAAAAAAACCGTTATAACGGCTGATAA  | 6.8 | 3.40E-05 | -10.287 |
| 66 | SO_3099   | TAAAGkwtkyrhwhhdcytGCCGATAa | D | 156 | 182 | TAACCTTAAT'TAAAACCTTGCCTTTAA | 6.8 | 3.40E-05 | -10.287 |
| 67 | SO_3328   | TAAAGkwtkyrhwhhdcytGCCGATAa | D | 32  | 58  | TGACGTTACAGCAATATATGCCGTTAA  | 6.8 | 3.40E-05 | -10.287 |
| 68 | SO_3331   | TAAAGkwtkyrhwhhdcytGCCGATAa | R | 213 | 239 | TGACGTTACAGCAATATATGCCGTTAA  | 6.8 | 3.40E-05 | -10.287 |
| 69 | ppx       | TAAAGkwtkyrhwhhdcytGCCGATAa | D | 211 | 237 | TAAAGTGCCTTCTCAAATTGCCATTTA  | 6.7 | 3.60E-05 | -10.222 |
| 70 | SO_0066   | TAAAGkwtkyrhwhhdcytGCCGATAa | D | 84  | 110 | TAAACTGACTGACAAATTTGAGGCTAA  | 6.7 | 3.60E-05 | -10.222 |
| 71 | SO_0670   | TAAAGkwtkyrhwhhdcytGCCGATAa | R | 31  | 57  | TAAACTGGGTTATCTTGGATGCGTTAA  | 6.7 | 3.60E-05 | -10.222 |
| 72 | SO_0671   | TAAAGkwtkyrhwhhdcytGCCGATAa | D | 159 | 185 | TAAACTGGGTTATCTTGGATGCGTTAA  | 6.7 | 3.60E-05 | -10.222 |
| 73 | SO_0925   | TAAAGkwtkyrhwhhdcytGCCGATAa | D | 44  | 70  | CAAACCTACTCTATTGTAAGCCATTAA  | 6.7 | 3.60E-05 | -10.222 |
| 74 | SO_0926   | TAAAGkwtkyrhwhhdcytGCCGATAa | R | 12  | 38  | CAAACCTACTCTATTGTAAGCCATTAA  | 6.7 | 3.60E-05 | -10.222 |
| 75 | SO_1445   | TAAAGkwtkyrhwhhdcytGCCGATAa | D | 50  | 76  | TAAACGATAGCGGCATGTCGCCGCTAT  | 6.7 | 3.60E-05 | -10.222 |
| 76 | SO_1710   | TAAAGkwtkyrhwhhdcytGCCGATAa | D | 128 | 154 | TAAACTCTCGCCCACTTTGGCCGACAA  | 6.7 | 3.60E-05 | -10.222 |
| 77 | SO_1766   | TAAAGkwtkyrhwhhdcytGCCGATAa | D | 281 | 307 | TAAATTAATAGTACAGGTTGAAGATAA  | 6.7 | 3.60E-05 | -10.222 |
| 78 | SO_2409   | TAAAGkwtkyrhwhhdcytGCCGATAa | R | 203 | 229 | TAAACGTTTAAT'TATGATAAACAATAA | 6.7 | 3.60E-05 | -10.222 |
| 79 | SO_1056   | TAAAGkwtkyrhwhhdcytGCCGATAa | D | 35  | 61  | TCAAGGTTGAATTGCACCCGCAATAG   | 6.6 | 3.90E-05 | -10.156 |
| 80 | SO_1100   | TAAAGkwtkyrhwhhdcytGCCGATAa | D | 162 | 188 | AAAAGAGTGCGAATTTTCATGCGGTTAA | 6.6 | 3.90E-05 | -10.156 |

|     |          |                             |   |     |     |                              |     |          |         |
|-----|----------|-----------------------------|---|-----|-----|------------------------------|-----|----------|---------|
| 81  | SO_4038  | TAAAGkwtkyrhwhhdcytGCCGATAa | R | 127 | 153 | TTATGGTGTTATTACCGCAGCCGTTAA  | 6.6 | 3.90E-05 | -10.156 |
| 82  | SO_1948  | TAAAGkwtkyrhwhhdcytGCCGATAa | R | 174 | 200 | TATACGTTCTAATATTGGCGACGACAA  | 6.5 | 4.10E-05 | -10.091 |
| 83  | SO_1949  | TAAAGkwtkyrhwhhdcytGCCGATAa | D | 21  | 47  | TATACGTTCTAATATTGGCGACGACAA  | 6.5 | 4.10E-05 | -10.091 |
| 84  | SO_3301  | TAAAGkwtkyrhwhhdcytGCCGATAa | R | 248 | 274 | TAAGCAATGTTTAAAAATTGGCCAATAT | 6.5 | 4.10E-05 | -10.091 |
| 85  | SO_4727  | TAAAGkwtkyrhwhhdcytGCCGATAa | R | 36  | 62  | TAAAGTTAACCATCCTTGTTACTTTTAA | 6.5 | 4.10E-05 | -10.091 |
| 86  | SO_A0042 | TAAAGkwtkyrhwhhdcytGCCGATAa | R | 26  | 52  | TAAAGTAATTCACCACTTTTTTGTATAT | 6.5 | 4.10E-05 | -10.091 |
| 87  | SO_1728  | TAAAGkwtkyrhwhhdcytGCCGATAa | R | 312 | 338 | TAAACAAATAAATCTGGCCACCGATTT  | 6.4 | 4.40E-05 | -10.027 |
| 88  | SO_3877  | TAAAGkwtkyrhwhhdcytGCCGATAa | D | 61  | 87  | TAAAGTACTCGTTTACTTCATCTATAA  | 6.4 | 4.40E-05 | -10.027 |
| 89  | SO_4036  | TAAAGkwtkyrhwhhdcytGCCGATAa | R | 94  | 120 | TTATGGTGTTATTTCCGCAGCCGTTAA  | 6.4 | 4.40E-05 | -10.027 |
| 90  | SO_3776  | TAAAGkwtkyrhwhhdcytGCCGATAa | R | 319 | 345 | TGAAGTTTTTATCTTCTAGGCGCAAT   | 6.3 | 4.70E-05 | -9.962  |
| 91  | SO_4018  | TAAAGkwtkyrhwhhdcytGCCGATAa | R | 229 | 255 | CAAACATCTCAGTAACCTGGCCGATAT  | 6.3 | 4.70E-05 | -9.962  |
| 92  | SO_4019  | TAAAGkwtkyrhwhhdcytGCCGATAa | D | 115 | 141 | CAAACATCTCAGTAACCTGGCCGATAT  | 6.3 | 4.70E-05 | -9.962  |
| 93  | SO_1701  | TAAAGkwtkyrhwhhdcytGCCGATAa | D | 93  | 119 | AAAACAAAGTCAAAAAATTGTCGCTAT  | 6.2 | 5.00E-05 | -9.898  |
| 94  | SO_1702  | TAAAGkwtkyrhwhhdcytGCCGATAa | R | 211 | 237 | AAAACAAAGTCAAAAAATTGTCGCTAT  | 6.2 | 5.00E-05 | -9.898  |
| 95  | fliK     | TAAAGkwtkyrhwhhdcytGCCGATAa | R | 40  | 66  | TAAAGCAAGCAAATAAAATGCCAACAA  | 6   | 5.70E-05 | -9.771  |
| 96  | kdtA     | TAAAGkwtkyrhwhhdcytGCCGATAa | D | 93  | 119 | TAAAAAAGGCTAACCAACGACCGCTAC  | 6   | 5.70E-05 | -9.771  |
| 97  | SO_4675  | TAAAGkwtkyrhwhhdcytGCCGATAa | R | 182 | 208 | TAAAAAAGGCTAACCAACGACCGCTAC  | 6   | 5.70E-05 | -9.771  |
| 98  | cydD     | TAAAGkwtkyrhwhhdcytGCCGATAa | D | 129 | 155 | TAAGCTACAAAACAGGCTTACCGTTAA  | 5.9 | 6.10E-05 | -9.708  |
| 99  | menG-2   | TAAAGkwtkyrhwhhdcytGCCGATAa | D | 287 | 313 | TAAACTGTACGCAACGCGGATCAATAG  | 5.9 | 6.10E-05 | -9.708  |
| 100 | SO_0346  | TAAAGkwtkyrhwhhdcytGCCGATAa | R | 78  | 104 | TAATGGGTGCAATTTAGTAGTCGATGA  | 5.9 | 6.10E-05 | -9.708  |
| 101 | SO_0588  | TAAAGkwtkyrhwhhdcytGCCGATAa | R | 103 | 129 | TAAATAATGCATGGGGGGCGGCGGTAA  | 5.9 | 6.10E-05 | -9.708  |
| 102 | SO_1699  | TAAAGkwtkyrhwhhdcytGCCGATAa | R | 172 | 198 | TAAATTTTATCTATAGATTGTGAATAA  | 5.9 | 6.10E-05 | -9.708  |
| 103 | SO_2226  | TAAAGkwtkyrhwhhdcytGCCGATAa | R | 117 | 143 | TAAAAC'TTCCCAAACTGGCTGATAT   | 5.9 | 6.10E-05 | -9.708  |
| 104 | SO_2484  | TAAAGkwtkyrhwhhdcytGCCGATAa | D | 21  | 47  | TAAAAAGATAATTTATCGAGACGATAA  | 5.9 | 6.10E-05 | -9.708  |
| 105 | SO_2805  | TAAAGkwtkyrhwhhdcytGCCGATAa | R | 269 | 295 | TCAAGGCATTGTAGTGAATGACGATAA  | 5.9 | 6.10E-05 | -9.708  |
| 106 | SO_3781  | TAAAGkwtkyrhwhhdcytGCCGATAa | R | 237 | 263 | TAAGCTACAAAACAGGCTTACCGTTAA  | 5.9 | 6.10E-05 | -9.708  |
| 107 | SO_4196  | TAAAGkwtkyrhwhhdcytGCCGATAa | R | 11  | 37  | TAAACTGTACGCAACGCGGATCAATAG  | 5.9 | 6.10E-05 | -9.708  |

|     |           |                             |   |     |     |                               |     |          |        |
|-----|-----------|-----------------------------|---|-----|-----|-------------------------------|-----|----------|--------|
| 108 | SO_4340   | TAAAGkwtkyrhwhhdcytGCCGATAa | R | 201 | 227 | TAAATTTAACCATGATCAGCTCGTTAA   | 5.9 | 6.10E-05 | -9.708 |
| 109 | pflB      | TAAAGkwtkyrhwhhdcytGCCGATAa | R | 181 | 207 | TTAACGTGGATTATCGGTTATCGATAA   | 5.8 | 6.50E-05 | -9.645 |
| 110 | SO_0420.2 | TAAAGkwtkyrhwhhdcytGCCGATAa | R | 146 | 172 | TTAAGATTATCATGGCTGCGCCGCTAG   | 5.8 | 6.50E-05 | -9.645 |
| 111 | SO_0500   | TAAAGkwtkyrhwhhdcytGCCGATAa | R | 273 | 299 | TAAAATAAAAAAAAAACGGCTGACGATCA | 5.8 | 6.50E-05 | -9.645 |
| 112 | SO_1942   | TAAAGkwtkyrhwhhdcytGCCGATAa | D | 235 | 261 | TAAAGTGC GTTAAACTCCCCTGATCT   | 5.8 | 6.50E-05 | -9.645 |
| 113 | SO_1944   | TAAAGkwtkyrhwhhdcytGCCGATAa | R | 60  | 86  | TAAAGTGC GTTAAACTCCCCTGATCT   | 5.8 | 6.50E-05 | -9.645 |
| 114 | SO_4665   | TAAAGkwtkyrhwhhdcytGCCGATAa | D | 243 | 269 | TATTGGGTTCGAGCCCCATGCCAATAA   | 5.8 | 6.50E-05 | -9.645 |
| 115 | SO_2110   | TAAAGkwtkyrhwhhdcytGCCGATAa | D | 77  | 103 | TATAGTTTGC GTTCTTAGTGTCCAAAA  | 5.7 | 6.90E-05 | -9.582 |
| 116 | SO_2228   | TAAAGkwtkyrhwhhdcytGCCGATAa | D | 277 | 303 | TCAACGTTCTAATTAGCAATCAGATAA   | 5.7 | 6.90E-05 | -9.582 |
| 117 | SO_2844   | TAAAGkwtkyrhwhhdcytGCCGATAa | R | 182 | 208 | TAACGTCGCCCAATGGCTCGCCAATAA   | 5.7 | 6.90E-05 | -9.582 |
| 118 | SO_4165   | TAAAGkwtkyrhwhhdcytGCCGATAa | R | 279 | 305 | TAAACGTTTCATCATTTAGTCACGAAAA  | 5.7 | 6.90E-05 | -9.582 |
| 119 | cdsA      | TAAAGkwtkyrhwhhdcytGCCGATAa | R | 39  | 65  | TAATGGAATCAACCAAATTGCTGTTAT   | 5.6 | 7.30E-05 | -9.52  |
| 120 | cobB      | TAAAGkwtkyrhwhhdcytGCCGATAa | R | 55  | 81  | TTAAGTTTTTAATTTGACCCCCATAAA   | 5.6 | 7.30E-05 | -9.52  |
| 121 | fur       | TAAAGkwtkyrhwhhdcytGCCGATAa | D | 176 | 202 | TTAAGTTTTTAATTTGACCCCCATAAA   | 5.6 | 7.30E-05 | -9.52  |
| 122 | mmsB      | TAAAGkwtkyrhwhhdcytGCCGATAa | D | 17  | 43  | TAAAGCAAACGCCTTAGCCTGCCATTCT  | 5.6 | 7.30E-05 | -9.52  |
| 123 | nrdD      | TAAAGkwtkyrhwhhdcytGCCGATAa | D | 67  | 93  | TTAAGTCTCTCCATTTAGCACCGCTAT   | 5.6 | 7.30E-05 | -9.52  |
| 124 | rbfA      | TAAAGkwtkyrhwhhdcytGCCGATAa | R | 35  | 61  | TAGAGTTACCATAGCTAATGTCATTAA   | 5.6 | 7.30E-05 | -9.52  |
| 125 | SO_0128   | TAAAGkwtkyrhwhhdcytGCCGATAa | R | 48  | 74  | TAAATTTTCACATCTGTAATACGAAAA   | 5.6 | 7.30E-05 | -9.52  |
| 126 | SO_0129   | TAAAGkwtkyrhwhhdcytGCCGATAa | D | 41  | 67  | TAAATTTTCACATCTGTAATACGAAAA   | 5.6 | 7.30E-05 | -9.52  |
| 127 | SO_0774   | TAAAGkwtkyrhwhhdcytGCCGATAa | R | 274 | 300 | ATAAGATGCTCCCCAGAATGCCGCTAC   | 5.6 | 7.30E-05 | -9.52  |
| 128 | SO_3128.2 | TAAAGkwtkyrhwhhdcytGCCGATAa | D | 138 | 164 | TAGGGTATCTGTAATACCTGCTGATAT   | 5.6 | 7.30E-05 | -9.52  |
| 129 | SO_3131   | TAAAGkwtkyrhwhhdcytGCCGATAa | R | 98  | 124 | TAGGGTATCTGTAATACCTGCTGATAT   | 5.6 | 7.30E-05 | -9.52  |
| 130 | SO_3573   | TAAAGkwtkyrhwhhdcytGCCGATAa | D | 157 | 183 | AAAAGTTAAACAAGCAGAAACCGAAAA   | 5.6 | 7.30E-05 | -9.52  |
| 131 | cheV-3    | TAAAGkwtkyrhwhhdcytGCCGATAa | R | 18  | 44  | AAAAGTATAGGTGCATTCTGGCGTTAC   | 5.5 | 7.80E-05 | -9.458 |
| 132 | flgA      | TAAAGkwtkyrhwhhdcytGCCGATAa | D | 162 | 188 | AAAAGTATAGGTGCATTCTGGCGTTAC   | 5.5 | 7.80E-05 | -9.458 |
| 133 | SO_1210.1 | TAAAGkwtkyrhwhhdcytGCCGATAa | D | 58  | 84  | TATAATTTGCGCCTTTTTTAGCGATAC   | 5.5 | 7.80E-05 | -9.458 |
| 134 | SO_2851   | TAAAGkwtkyrhwhhdcytGCCGATAa | D | 133 | 159 | TAGTGATTCTACATAAAAGGACGATAA   | 5.5 | 7.80E-05 | -9.458 |

|     |           |                             |   |     |     |                               |     |          |        |
|-----|-----------|-----------------------------|---|-----|-----|-------------------------------|-----|----------|--------|
| 135 | SO_2852   | TAAAGkwtkyrhwhhdcytGCCGATAa | R | 109 | 135 | TAGTGATTCTACATAAAAAGGACGATAA  | 5.5 | 7.80E-05 | -9.458 |
| 136 | SO_4340   | TAAAGkwtkyrhwhhdcytGCCGATAa | D | 26  | 52  | TACAGGATGTACCATCGGAAGCGATAG   | 5.5 | 7.80E-05 | -9.458 |
| 137 | SO_4341   | TAAAGkwtkyrhwhhdcytGCCGATAa | R | 75  | 101 | TACAGGATGTACCATCGGAAGCGATAG   | 5.5 | 7.80E-05 | -9.458 |
| 138 | SO_4454   | TAAAGkwtkyrhwhhdcytGCCGATAa | R | 255 | 281 | TAAACGTTTGTAGAAATATCGGTCGACGA | 5.5 | 7.80E-05 | -9.458 |
| 139 | SO_4528   | TAAAGkwtkyrhwhhdcytGCCGATAa | R | 197 | 223 | TAAAGGTTGTAGAAAGTGCAGTGATAC   | 5.5 | 7.80E-05 | -9.458 |
| 140 | SO_4529   | TAAAGkwtkyrhwhhdcytGCCGATAa | D | 100 | 126 | TAAAGGTTGTAGAAAGTGCAGTGATAC   | 5.5 | 7.80E-05 | -9.458 |
| 141 | lrp       | TAAAGkwtkyrhwhhdcytGCCGATAa | R | 54  | 80  | TCAGGATTATGTTGATGCTGGCGCTAA   | 5.4 | 8.30E-05 | -9.397 |
| 142 | SO_0026   | TAAAGkwtkyrhwhhdcytGCCGATAa | D | 19  | 45  | AAAAGTATGTCACCATTGTGGCAATCA   | 5.4 | 8.30E-05 | -9.397 |
| 143 | SO_0027   | TAAAGkwtkyrhwhhdcytGCCGATAa | R | 156 | 182 | AAAAGTATGTCACCATTGTGGCAATCA   | 5.4 | 8.30E-05 | -9.397 |
| 144 | SO_3047   | TAAAGkwtkyrhwhhdcytGCCGATAa | D | 73  | 99  | TAAATTTACGGGCATTAATGCCGAAAA   | 5.4 | 8.30E-05 | -9.397 |
| 145 | SO_3371   | TAAAGkwtkyrhwhhdcytGCCGATAa | D | 175 | 201 | TAAACGTGTCCAAACTCGTCGGGATAA   | 5.4 | 8.30E-05 | -9.397 |
| 146 | SO_4284   | TAAAGkwtkyrhwhhdcytGCCGATAa | R | 86  | 112 | TCAACTTTACCAGCAACTAGCAAATAA   | 5.4 | 8.30E-05 | -9.397 |
| 147 | SO_1414   | TAAAGkwtkyrhwhhdcytGCCGATAa | R | 141 | 167 | TAATTTATGACAACCTCCTGTTGATAA   | 5.3 | 8.80E-05 | -9.336 |
| 148 | SO_1415   | TAAAGkwtkyrhwhhdcytGCCGATAa | D | 167 | 193 | TAATTTATGACAACCTCCTGTTGATAA   | 5.3 | 8.80E-05 | -9.336 |
| 149 | SO_1771.2 | TAAAGkwtkyrhwhhdcytGCCGATAa | R | 52  | 78  | TACGCGAGTTAAATACCCAGCCGTTAA   | 5.3 | 8.80E-05 | -9.336 |
| 150 | crp       | TAAAGkwtkyrhwhhdcytGCCGATAa | D | 12  | 38  | TCAAGTTAGCCTGAAATACGTCCATAA   | 5.2 | 9.40E-05 | -9.274 |
| 151 | phoP      | TAAAGkwtkyrhwhhdcytGCCGATAa | D | 20  | 46  | TAAAGATAATGACTTTAAAGACAATAG   | 5.2 | 9.40E-05 | -9.274 |
| 152 | rpmE      | TAAAGkwtkyrhwhhdcytGCCGATAa | R | 32  | 58  | TAGATTATCTGCGCATTTTCTCGATAA   | 5.2 | 9.40E-05 | -9.274 |
| 153 | SO_0083   | TAAAGkwtkyrhwhhdcytGCCGATAa | R | 60  | 86  | TAAAGCGGGTCCCCAGCTCGCCGACTA   | 5.2 | 9.40E-05 | -9.274 |
| 154 | SO_0316   | TAAAGkwtkyrhwhhdcytGCCGATAa | R | 28  | 54  | TAAACTGACAATATTTACTTTTCGTTAT  | 5.2 | 9.40E-05 | -9.274 |
| 155 | SO_0625   | TAAAGkwtkyrhwhhdcytGCCGATAa | R | 344 | 370 | TCAAGTTAGCCTGAAATACGTCCATAA   | 5.2 | 9.40E-05 | -9.274 |
| 156 | SO_0786   | TAAAGkwtkyrhwhhdcytGCCGATAa | R | 16  | 42  | TTAATGATATTTAAATCTAGACGCTAC   | 5.2 | 9.40E-05 | -9.274 |
| 157 | SO_3025   | TAAAGkwtkyrhwhhdcytGCCGATAa | D | 294 | 320 | TTATCTGTGCACAACATGCGCCGTTAT   | 5.2 | 9.40E-05 | -9.274 |
| 158 | SO_4112.1 | TAAAGkwtkyrhwhhdcytGCCGATAa | D | 345 | 371 | TTAAGGTTTCTTTTAACTCGCCCCAAA   | 5.2 | 9.40E-05 | -9.274 |
| 159 | SO_4550   | TAAAGkwtkyrhwhhdcytGCCGATAa | D | 5   | 31  | TAATCGTTATCCACCTAAAGGCAATAT   | 5.2 | 9.40E-05 | -9.274 |
| 160 | SO_A0002  | TAAAGkwtkyrhwhhdcytGCCGATAa | R | 126 | 152 | TAAAATTATAATATTGCTCGCTGTTAT   | 5.2 | 9.40E-05 | -9.274 |
| 161 | rimI      | TAAAGkwtkyrhwhhdcytGCCGATAa | R | 7   | 33  | TAATGTATCCAAAACACGGCGCAATAA   | 5.1 | 1.00E-04 | -9.214 |

|     |          |                             |   |     |     |                              |     |          |        |
|-----|----------|-----------------------------|---|-----|-----|------------------------------|-----|----------|--------|
| 162 | SO_1056  | TAAAGkwtkyrhwhhdcytGCCGATAa | R | 362 | 388 | TAAATTCGGTTAGCAGCCTAACGTTAA  | 5.1 | 1.00E-04 | -9.214 |
| 163 | SO_1489  | TAAAGkwtkyrhwhhdcytGCCGATAa | D | 334 | 360 | AAAAC TGTGATTTATCTCAGGCGATAT | 5.1 | 1.00E-04 | -9.214 |
| 164 | SO_1510  | TAAAGkwtkyrhwhhdcytGCCGATAa | D | 189 | 215 | TCAAGACAATACTCTGCTCACCGAAAA  | 5.1 | 1.00E-04 | -9.214 |
| 165 | SO_2280  | TAAAGkwtkyrhwhhdcytGCCGATAa | R | 124 | 150 | CAAATAAGCCAATCTTGGTGACGATAT  | 5.1 | 1.00E-04 | -9.214 |
| 166 | SO_2281  | TAAAGkwtkyrhwhhdcytGCCGATAa | D | 178 | 204 | CAAATAAGCCAATCTTGGTGACGATAT  | 5.1 | 1.00E-04 | -9.214 |
| 167 | SO_4073  | TAAAGkwtkyrhwhhdcytGCCGATAa | D | 65  | 91  | CAAAAAAGACTCAGTAACGGCCGATAA  | 5.1 | 1.00E-04 | -9.214 |
| 168 | SO_4075  | TAAAGkwtkyrhwhhdcytGCCGATAa | R | 291 | 317 | CAAAAAAGACTCAGTAACGGCCGATAA  | 5.1 | 1.00E-04 | -9.214 |
| 169 | SO_A0108 | TAAAGkwtkyrhwhhdcytGCCGATAa | D | 330 | 356 | TATATATAAATAATATCTCGCCGAAAA  | 5.1 | 1.00E-04 | -9.214 |
| 170 | SO_A0159 | TAAAGkwtkyrhwhhdcytGCCGATAa | D | 46  | 72  | AAAAGGTGTTGTCATTTGTGGCGACAC  | 5.1 | 1.00E-04 | -9.214 |
